# Supplementary material for: Statistical Analysis and Machine Learning Prediction of Disease Outcomes for COVID-19 and Pneumonia Patients
Source: Front Cell Infect Microbiol. 2022 Apr 19;12:838749. doi: 10.3389/fcimb.2022.838749 (PMC9063041; doi:10.3389/fcimb.2022.838749)
Supplement: Supplementary file 1 [file DataSheet_1.xlsx]

## Sheet: Table S1
Table S1. List of clinical features in MIMIC-III and eICU data.
Data	Category	Time-series data?	Features
MIMIC-III	Vital signs	Yes	Diastolic blood pressure (DBP), Heart rate (HR), Mean blood pressure (MBP), Respiratory rate (RR), SpO2, Systolic blood pressure (SBP), Temperature
	Laboratory measurements	Yes	Anion Gap, Bicarbonate, Blood urea nitrogen (BUN), Creatinine, Glucose, Hematocrit, Hemoglobin, INR, Lymphocytes, MCH concentration (MCHC), Mean corpuscular hemoglobin (MCH), Mean corpuscular volume (MCV), PaO2, Partial thromboplastin time (PTT), pH, Platelets, Potassium, Prothrombin time (PT), Red blood cells (RBCs), Red cell distribution width (RDW), SaO2, Sodium, White blood cells (WBCs)
	Drugs	No	5% dextrose, Abciximab, Accuzyme, Acetaminophen, Acyclovir, Albumin, Albuterol, Allopurinol, Aluminum-magnesium hydroxide, Amiodarone, Amoxicillin-clavulanate, Ampicillin, Artificial, Aspirin, Atenolol, Azithromycin, Bupropion, Calcium acetate, Calcium carbonate, Calcium gluconate, Cefazolin, Cefepime, Ceftazidime, Ceftriaxone, Chlordiazepoxide hcl, Ciprofloxacin, Clindamycin, Clonidine, Clotrima…
eICU	Vital signs	Yes	Diastolic blood pressure (DBP), Heart rate (HR), Mean blood pressure (MBP), Respiratory rate (RR), SpO2, Systolic blood pressure (SBP), Temperature
	Laboratory measurements	Yes	Anion Gap, Blood urea nitrogen (BUN), Creatinine, Glucose, MCH concentration (MCHC), Mean corpuscular hemoglobin (MCH), Mean corpuscular volume (MCV), PaO2, Partial thromboplastin time (PTT), pH, Platelets, Potassium, Prothrombin time (PT), Red blood cells (RBCs), Red cell distribution width (RDW), Sodium, White blood cells (WBCs)
	Drugs	No	Acetaminophen, Acyclovir, Albuterol, Allopurinol, Aspirin, Atenolol, Azithromycin, Calcium acetate, Calcium carbonate, Cefazolin, Cefepime, Ceftazidime, Ceftriaxone, Chlordiazepoxide hcl, Ciprofloxacin, Clonidine, Clotrimazole, Cyclophosphamide, Dexamethasone, Dextrose, Diazepam, Diphenoxylate-atropine, Erythromycin, Famotidine, Fentanyl, Fluconazole, Fluoxetine, Folic acid, Furosemide, Guaifenes…

## Sheet: Table S2
Table S2. Hyperparameters of the machine learning models for the COVID-19 dataset.
Model	Hyperparameter	Description	Value
Logistic regression (L1 regularization)	penalty	Used to specify the norm used in the penalization	l1
	solver	Algorithm used for optimization	liblinear
	C	Inverse of regularization strength. Smaller values indicate stronger regularization.	2
Logistic regression (L2 regularization)	penalty	Used to specify the norm used in the penalization	l2
	solver	Algorithm used for optimization	lbfgs
	C	Inverse of regularization strength. Smaller values indicate stronger regularization.	2
Random forest	n_estimators	Number of trees	6
	max_depth	Maximum depth of the trees	4
	min_samples_split	The minimum number of samples required to split an internal node	20
XGBoost	learning_rate	Boosting learning rate	0.4
	n_estimators	Number of gradient boosted trees, equivalent to number of boosting rounds	20
	max_depth	Maximum tree depth for base learners	4
	reg_alpha	L1 regularization term on weights	0.8
	reg_lambda	L2 regularization term on weights	0.8
	subsample	Subsample ratio of the training instance	0.8
	colsample_bytree	Subsample ratio of columns when constructing each tree	0.9

## Sheet: Table S3
Table S3. Top 10 most important features from different models on the COVID-19 dataset.
ALT: alanine aminotransferase; APACHE II: acute physiology and chronic health evaluation II; APTT: activated partial thromboplastin time; CRP: C-reactive protein; DB: direct bilirubin; ECOG: eastern cooperative oncology group; PT: prothrombin time; WBCs: white blood cell counts.
Model	Rank	Feature	Feature importance
Logistic regression (L1 regularization)	1	APACHE II	1.935
	2	Neutrophiles	0.73
	3	CRP	0.409
	4	Lymphocytes	0.36
	5	Monocytes	0.316
	6	APTT	0.264
	7	PT	0.213
	8	Troponin	0.21
	9	DB	0.21
	10	CD3 T cell	0.181
Logistic regression (L2 regularization)	1	APACHE II	0.868
	2	Neutrophiles	0.651
	3	Lymphocytes	0.61
	4	Troponin	0.536
	5	PT	0.513
	6	CRP	0.484
	7	Monocytes	0.474
	8	WBCs	0.447
	9	ECOG	0.428
	10	APTT	0.374
Random forest	1	PT	0.152
	2	Neutrophiles	0.138
	3	Lymphocytes	0.117
	4	CRP	0.085
	5	Hemoglobin	0.078
	6	Total protein	0.066
	7	ALT	0.051
	8	Procalcitonin	0.04
	9	Platelets	0.036
	10	DB	0.025

## Sheet: Table S4
Table S4. Hyperparameters of the machine learning models for the MIMIC-III pneumonia dataset.
Model	Hyperparameter	Description	Value
Logistic regression (L1 regularization)	penalty	Used to specify the norm used in the penalization	l1
	solver	Algorithm used for optimization	liblinear
	C	Inverse of regularization strength. Smaller values indicate stronger regularization.	2
XGBoost	learning_rate	Boosting learning rate	0.04
	n_estimators	Number of gradient boosted trees, equivalent to number of boosting rounds	100
	max_depth	Maximum tree depth for base learners	6
	subsample	Subsample ratio of the training instance	0.8

## Sheet: Table S5
Table S5. AUROC and AUPRC values of different models during 10-fold and 15-fold cross-validations on the MIMIC-III data.
Cross-validation fold	Evaluation metric	Observation window (h)	Model	Prediction window (h)
				6	12	18	24	36	48	60	72
10-fold	AUROC	24	Logistic regression (L1)	0.966±0.011	0.956±0.019	0.930±0.016	0.911±0.024	0.874±0.027	0.855±0.027	0.833±0.031	0.806±0.051
			XGBoost	0.971±0.007	0.963±0.013	0.933±0.011	0.909±0.012	0.882±0.026	0.845±0.020	0.843±0.036	0.813±0.035
		48	Logistic regression (L1)	0.952±0.016	0.946±0.014	0.919±0.025	0.896±0.025	0.871±0.030	0.837±0.038	0.830±0.041	0.802±0.035
			XGBoost	0.957±0.019	0.950±0.013	0.917±0.015	0.898±0.028	0.866±0.041	0.843±0.038	0.827±0.044	0.811±0.037
		72	Logistic regression (L1)	0.939±0.022	0.931±0.016	0.905±0.031	0.883±0.013	0.870±0.022	0.835±0.043	0.811±0.045	0.786±0.020
			XGBoost	0.942±0.019	0.934±0.019	0.907±0.023	0.889±0.020	0.861±0.027	0.841±0.029	0.806±0.043	0.798±0.043
	AUPRC	24	Logistic regression (L1)	0.892±0.023	0.859±0.035	0.797±0.030	0.779±0.044	0.729±0.056	0.672±0.046	0.649±0.045	0.603±0.080
			XGBoost	0.901±0.027	0.875±0.026	0.798±0.028	0.781±0.029	0.726±0.057	0.658±0.047	0.646±0.078	0.608±0.060
		48	Logistic regression (L1)	0.860±0.042	0.850±0.036	0.789±0.046	0.759±0.060	0.721±0.066	0.660±0.060	0.677±0.050	0.628±0.055
			XGBoost	0.867±0.032	0.857±0.028	0.786±0.031	0.763±0.052	0.715±0.072	0.683±0.058	0.682±0.061	0.638±0.057
		72	Logistic regression (L1)	0.835±0.046	0.822±0.026	0.779±0.044	0.752±0.061	0.733±0.025	0.707±0.056	0.661±0.076	0.608±0.054
			XGBoost	0.842±0.044	0.819±0.036	0.787±0.048	0.757±0.049	0.732±0.041	0.709±0.043	0.641±0.073	0.635±0.074
15-fold	AUROC	24	Logistic regression (L1)	0.966±0.017	0.956±0.022	0.930±0.023	0.913±0.028	0.875±0.025	0.857±0.026	0.833±0.038	0.809±0.057
			XGBoost	0.970±0.011	0.964±0.014	0.933±0.013	0.913±0.017	0.883±0.026	0.847±0.028	0.840±0.034	0.815±0.021
		48	Logistic regression (L1)	0.953±0.019	0.947±0.019	0.920±0.025	0.896±0.036	0.871±0.036	0.840±0.039	0.832±0.050	0.807±0.038
			XGBoost	0.957±0.019	0.950±0.021	0.918±0.023	0.895±0.032	0.875±0.041	0.843±0.036	0.828±0.050	0.803±0.046
		72	Logistic regression (L1)	0.940±0.015	0.932±0.019	0.909±0.033	0.883±0.025	0.870±0.017	0.838±0.040	0.810±0.056	0.790±0.048
			XGBoost	0.941±0.017	0.933±0.024	0.911±0.028	0.884±0.026	0.861±0.029	0.843±0.035	0.818±0.049	0.794±0.038
	AUPRC	24	Logistic regression (L1)	0.893±0.038	0.860±0.045	0.802±0.046	0.783±0.055	0.733±0.052	0.681±0.056	0.647±0.070	0.619±0.094
			XGBoost	0.897±0.035	0.875±0.038	0.805±0.035	0.784±0.043	0.727±0.074	0.669±0.053	0.656±0.076	0.613±0.053
		48	Logistic regression (L1)	0.863±0.043	0.849±0.049	0.790±0.047	0.756±0.076	0.727±0.070	0.669±0.060	0.685±0.060	0.641±0.061
			XGBoost	0.867±0.052	0.856±0.045	0.781±0.043	0.749±0.065	0.735±0.075	0.674±0.078	0.683±0.078	0.629±0.054
		72	Logistic regression (L1)	0.839±0.034	0.828±0.036	0.787±0.058	0.751±0.081	0.735±0.030	0.708±0.055	0.660±0.105	0.631±0.068
			XGBoost	0.836±0.055	0.818±0.052	0.783±0.076	0.755±0.059	0.737±0.039	0.713±0.050	0.655±0.093	0.633±0.061

## Sheet: Table S6
Table S6. The top 10 most important drug features ranked by average attention weights for the example MIMIC-III patient.
Rank	Feature
1	Potassium phosphate
2	Ipratropium bromide
3	Calcium carbonate
4	Zolpidem tartrate
5	Influenza virus vaccine
6	Vasopressin
7	Aspirin
8	Linezolid
9	Albumin
10	Fluticasone propionate
